# Supplementary material for: A Novel Model of Cancer-Induced Peripheral Neuropathy and the Role of TRPA1 in Pain Transduction
Source: Hindawi journal article supplement (doi:10.1155/2017/3517207), 2017-01-01

Supplementary File:

# A NOVEL MODEL OF CANCER-INDUCED PERIPHERAL NEUROPATHY AND THE ROLE OF TRPA1 IN PAIN TRANSDUCTION

Ahmad Maqboul, Bakheet Elsadek

**Figure S1:** Quantification of TRPA1 and CGRP Co-Expression

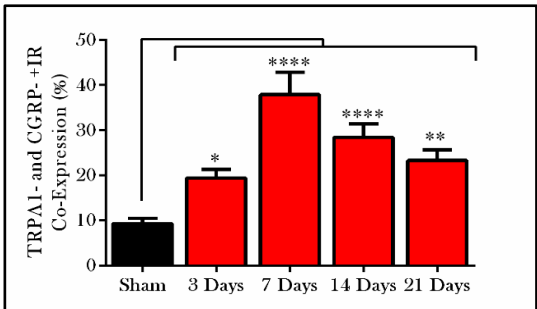

**Figure S2:** Anti-TRPA1 antibody (Santa Cruz, sc-66808) - 130 kDa

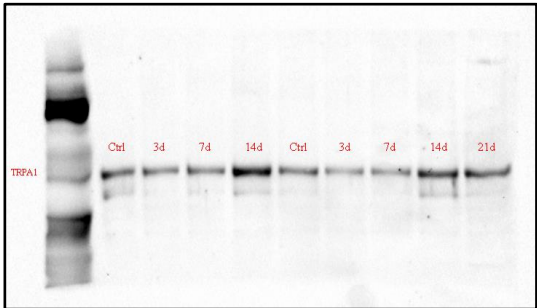

**Figure S3:** Anti- $\beta$ -actin antibody (Sigma, A3854) - 42 kDa

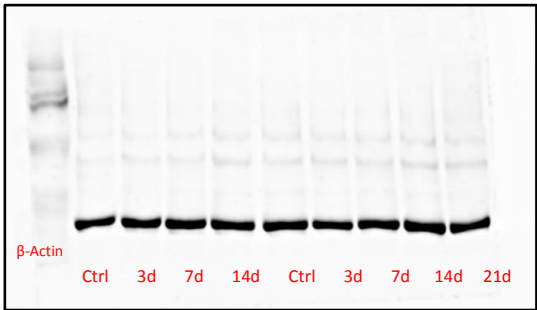

Supplement: f1 [file 3517207.f1.pdf]
